# Supplementary material
Source: PubMed Central journal article supplement (PMC4545271)
Supplement: NIHMS715234-supplement-supplement.pdf [file NIHMS715234-supplement-supplement.pdf]

## Supplementary Online Content

Peljto AL, Zhang Y, Fingerlin TE, et al. Association between the *MUC5B* promoter polymorphism and survival in patients with idiopathic pulmonary fibrosis. *JAMA*. doi:10.1001/jama.2013.5827

**eFigure 1.** Flow Diagram of Patients Included in Each Cohort

**eTable 1.** Survival Analysis Model in INSPIRE Cohort, Adjusted for MMP-7 and Treatment

**eTable 2.** Survival Analysis Model in INSPIRE Cohort, Adjusted for MMP-7, Treatment, and Interaction

This supplementary material has been provided by the authors to give readers additional information about their work.

**eFigure 1.** Flow Diagram of Patients Included in Each Cohort

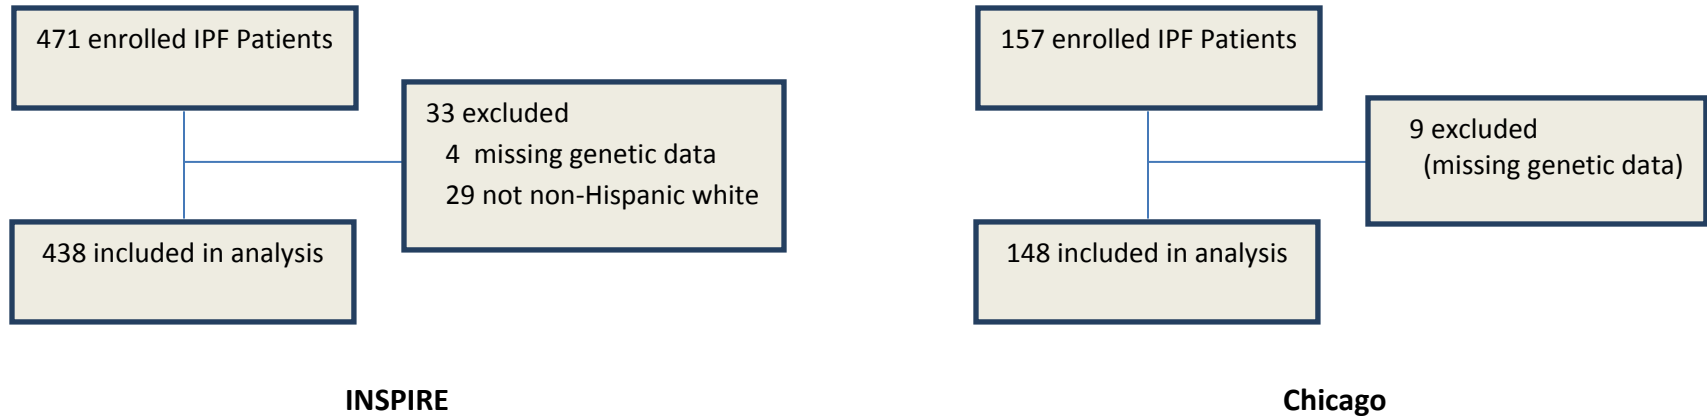

**eTable 1.** Survival Analysis Model in INSPIRE Cohort, Adjusted for MMP-7 and Treatment

| <b>Variable<sup>a</sup></b> | <b>HR (95% CI)</b> | <b>p-value</b> |
|-----------------------------|--------------------|----------------|
| <b>MMP7 (&lt;5.7ng/ml)</b>  | 2.18 (1.10 – 4.32) | 0.03           |
| <b><i>MUC5B</i></b>         |                    | <0.001         |
| GT                          | 0.44 (0.29 – 0.68) |                |
| TT                          | 0.20 (0.08 – 0.47) |                |
| <b>FVC (liters)</b>         | 0.55 (0.34 – 0.89) | 0.01           |
| <b>DLCO (ml/min/mm Hg)</b>  | 0.89 (0.85 – 0.95) | <0.001         |
| <b>Sex (male)</b>           | 0.25 (0.12 – 0.53) | <0.001         |
| <b>Treatment (placebo)</b>  | 1.48 (0.86 – 2.51) | 0.16           |

<sup>a</sup>Reference group and units shown in parentheses for categorical and continuous predictors, respectively.

**eTable 2.** Survival Analysis Model in INSPIRE Cohort, Adjusted for MMP-7, Treatment, and Interaction

| <b>Variable<sup>a</sup></b>   | <b>HR<sup>b</sup> (95% CI)</b> | <b>p-value</b> |
|-------------------------------|--------------------------------|----------------|
| <b>MMP7 (&lt;5.7ng/ml)</b>    | 2.32 (0.30 – 0.71)             | 0.02           |
| <b><i>MUC5B</i></b>           | --                             | 0.63           |
| <b>FVC (liters)</b>           | 0.54 (0.33 – 0.87)             | 0.01           |
| <b>DLCO (ml/min/mm Hg)</b>    | 0.89 (0.84 – 0.94)             | <0.001         |
| <b>Sex (male)</b>             | 0.23 (0.11 – 0.50)             | <0.001         |
| <b>Treatment (placebo)</b>    | --                             | 0.03           |
| <b>Treatment*<i>MUC5B</i></b> | --                             | 0.07           |

<sup>a</sup>Reference group and units shown in parentheses for categorical and continuous predictors, respectively.

<sup>b</sup>Hazard ratios not available for covariates involved in interaction terms.
